# Supplementary material for: Learning by Doing: The Use of Distance, Corners and Length in Rewarded Geometric Tasks by Zebrafish (Danio rerio)
Source: MDPI journal article supplement (doi:10.3390/ani11072001), 2021-07-05
Supplement: s1 [file animals-1266333-supplementary.xlsx]

## Sheet: Experiment 1_Distance
fish	diagonal	trials_criterion	CR_first_day1	X1_X2_first_day1	CR_tot_day1	X1X2_tot_day1	CR_first_day2	X1_X2_first_day2	CR_tot_day2	X1X2_tot_day2	c_first	x1_first	r_first	x2_first	c_tot	x1_tot	r_tot	x2_tot	c_first_day2	x1_first_day2	r_first_day2	x2_first_day2	c_tot_day2	x1_tot_day2	r_tot_day2	x2_tot_day2
2	CR	42	87.5	12.5	81.82	18.18	100	0	100	0	37.5	12.5	50	0	27.27	9.09	54.55	9.09	25	0	75	0	22.22	0	77.78	0
3	CR	16	75	25	78.57	21.43	100	0	90.91	9.09	50	25	25	0	50	14.29	28.57	7.14	62.5	0	37.5	0	63.64	9.09	27.27	0
4	CR	64	75	25	72.73	27.27	70	30	76.92	23.08	37.5	25	37.5	0	45.45	27.27	27.27	0	30	10	40	20	30.77	7.69	46.15	15.38
5	X1X2	16	75	25	72.73	27.27	75	25	75	25	25	25	50	0	18.18	27.27	54.55	0	62.5	12.5	12.5	12.5	58.33	16.67	16.67	8.33
6	X1X2	45	88.89	11.11	71.43	28.57	70	30	68.75	31.25	44.44	11.11	44.44	0	35.71	14.29	35.71	14.29	20	10	50	20	18.75	12.5	50	18.75
7	X1X2	33	77.78	22.22	71.43	28.57	75	25	75	25	33.33	11.11	44.44	11.11	28.57	21.43	42.86	7.14	37.5	0	37.5	25	41.67	8.33	33.33	16.67
9	CR	60	80	20	71.43	28.57	75	25	75	25	40	10	40	10	35.71	21.43	35.71	7.14	62.5	12.5	12.5	12.5	58.33	8.33	16.67	16.67
10	X1X2	41	87.5	12.5	88.89	11.11	75	25	80	20	62.5	0	25	12.5	55.56	0	33.33	11.11	37.5	25	37.5	0	30	20	50	0

## Sheet: Experiment 2_Corners
fish	diagonal	trials_criterion	CR_first_day1	X1_X2_first_day1	CR_tot_day1	X1X2_tot_day1	CR_first_day2	X1_X2_first_day2	CR_tot_day2	X1X2_tot_day2	c_first	x1_first	r_first	x2_first	c_tot	x1_tot	r_tot	x2_tot	c_first_day2	x1_first_day2	r_first_day2	x2_first_day2	c_tot_day2	x1_tot_day2	r_tot_day2	x2_tot_day2
1	CR	24	75	25	72.73	27.27	87.5	12.5	81.82	18.18	50	12.5	25	12.5	54.55	18.18	18.18	9.09	62.5	12.5	25	0	63.64	18.18	18.18	0
2	CR	68	75	25	80	20	70	30	76.92	23.08	25	12.5	50	12.5	30	10	50	10	30	30	40	0	38.46	23.08	38.46	0
3	CR	58	75	25	72.73	27.27	75	25	75	25	37.5	25	37.5	0	45.45	18.18	27.27	9.09	37.5	0	37.5	25	33.33	8.33	41.67	16.67
4	CR	58	75	25	81.82	18.18	75	25	80	20	0	12.5	75	12.5	9.09	9.09	72.73	9.09	37.5	25	37.5	0	50	20	30	0
5	X1X2	75	75	25	80	20	70	30	71.43	28.57	62.5	12.5	12.5	12.5	70	10	10	10	40	10	30	20	50	14.29	21.43	14.29
6	X1X2	64	87.5	12.5	72.73	27.27	100	0	100	0	25	0	62.5	12.5	18.18	9.09	54.55	18.18	75	0	25	0	75	0	25	0
7	X1X2	68	75	25	72.73	27.27	87.5	12.5	88.89	11.11	62.5	0	12.5	25	54.55	0	18.18	27.27	50	0	37.5	12.5	44.44	0	44.44	11.11
8	X1X2	68	70	30	76.92	23.08	87.5	12.5	88.89	11.11	10	20	60	10	30.77	15.38	46.15	7.69	37.5	0	50	12.5	44.44	0	44.44	11.11

## Sheet: Experiment 3_Length
fish	diagonal	trials_criterion	CR_first_day1	X1_X2_first_day1	CR_tot_day1	X1X2_tot_day1	CR_first_day2	X1_X2_first_day2	CR_tot_day2	X1X2_tot_day2	c_first	x1_first	r_first	x2_first	c_tot	x1_tot	r_tot	x2_tot	c_first_day2	x1_first_day2	r_first_day2	x2_first_day2	c_tot_day2	x1_tot_day2	r_tot_day2	x2_tot_day2
1	CR	34	70	30	76.92	23.08	75	25	80	20	40	20	30	10	46.15	15.38	30.77	7.69	25	25	50	0	20	20	60	0
2	CR	32	75	25	80	20	75	25	72.73	27.27	0	25	75	0	0	20	80	0	12.5	12.5	62.5	12.5	18.18	9.09	54.55	18.18
3	CR	98	77.5	12.5	88.89	11.11	75	25	69.23	30.77	25	12.5	62.5	0	22.22	11.11	66.67	0	37.5	0	37.5	25	30.77	7.69	38.46	23.08
4	CR	74	75	25	80	20	75	25	80	20	25	12.5	50	12.5	40	10	40	10	62.5	0	12.5	25	50	0	30	20
5	X1X2	24	75	25	72.73	27.27	75	25	80	20	50	0	25	25	54.55	0	18.18	27.27	50	12.5	25	12.5	50	10	30	20
6	X1X2	32	75	25	72.73	27.27	87.5	12.5	88.89	11.11	50	25	25	0	45.45	18.18	27.27	9.09	75	0	12.5	12.5	77.78	0	11.11	11.11
7	X1X2	72	75	25	80	20	75	25	76.92	23.08	25	0	50	25	40	0	40	20	25	12.5	50	12.5	23.08	15.38	53.85	7.69
8	X1X2	24	87.5	12.5	80	20	100	0	100	0	37.5	0	50	12.5	30	0	50	20	50	0	50	0	50	0	50	0

## Sheet: Experiment 4_Control
fish	diagonal	a1first	b1first	c1first	d1first	a1tot	b1tot	c1tot	d1tot	a2f	b2f	c2f	d2f	a2t	b2t	c2t	d2t	a3f	b3f	c3f	d3f	a3t	b3t	c3t	d3t	a4f	b4f	c4f	d4f	a4t	b4t	c4t	d4t	a5f	b5f	c5f	d5f	a5t	b5t	c5t	d5t	a6f	b6f	c6f	d6f	a6t	b6t	c6t	d6t
1	CR	50	0	0	50	58.33	0	8.33	33.33	25	12.5	50	12.5	21.43	21.43	35.71	21.43	87.5	0	0	12.5	88.89	0	0	11.11	37.5	37.5	12.5	12.5	41.67	25	25	8.33	50	12.5	0	37.5	46.67	13.33	0	40	50	12.5	37.5	0	55.56	11.11	33.33	0
2	CR	25	12.5	37.5	25	25	30	15	30	25	12.5	50	12.5	16.67	16.67	50	16.67	50	12.5	12.5	25	53.33	6.67	6.67	33.33	62.5	0	37.5	0	62.5	0	37.5	0	37.5	25	37.5	0	28.57	28.57	28.57	14.29	12.5	25	12.5	50	18.75	18.75	31.25	31.25
3	CR	50	25	25	0	41.67	25	25	8.33	25	50	12.5	12.5	25	37.5	25	12.5	37.5	12.5	12.5	37.5	25	12.5	25	37.5	12.5	37.5	12.5	37.5	37.5	18.75	18.75	25	25	12.5	37.5	25	23.08	15.38	38.46	23.08	12.5	50	0	37.5	23.81	38.1	19.05	19.05
4	X1X2	37.5	37.5	12.5	12.5	31.25	31.25	18.75	18.75	25	37.5	25	12.5	35.71	28.57	21.43	14.29	25	25	50	0	20	20	60	0	25	25	37.5	12.5	10.53	26.32	31.58	31.58	25	25	25	25	25	18.75	25	31.25	12.5	25	50	12.5	27.27	18.18	45.45	9.09
5	X1X2	37.5	37.5	0	25	46.15	23.08	15.38	15.38	25	12.5	12.5	50	25	30	15	30	25	12.5	50	12.5	25	16.67	33.33	25	37.5	37.5	12.5	12.5	23.53	52.94	17.65	5.88	75	25	0	0	60	30	10	0	25	25	37.5	12.5	27.27	18.18	45.45	9.09
6	X1X2	25	37.5	25	12.5	23.08	38.46	30.77	7.69	60	40	0	0	66.67	33.33	0	0	25	50	0	25	33.33	22.22	11.11	33.33	50	25	12.5	12.5	60	20	10	10	25	12.5	25	37.5	25	6.25	12.5	56.25	12.5	50	12.5	25	31.25	37.5	12.5	18.75
[truncated: 72 more columns]
